# Supplementary material for: Temporal sequences of brain activity at rest are constrained by white matter structure and modulated by cognitive demands
Source: PubMed Central journal article supplement (PMC7244753; doi:10.1038/s42003-020-0961-x), 2020-05-22
Supplement: 42003_2020_961_MOESM1_ESM.pdf [file 42003_2020_961_MOESM1_ESM.pdf]

## Description of Additional Supplementary Files

### Supplementary Data Zip File

**File Name:** Fig2a\_\_OverallClusterCentroids\_k5ScanCLaus250Z0final.mat

**Description:** Figure 2a Source Data

**File Name:** Fig2b\_\_YeoSystemAlignment\_k5.mat

**Description:** Figure 2b Source Data

**File Name:** Fig3a\_\_FractionalOccupancy.RData

**Description:** Figure 3a Source Data

**File Name:** Fig3b\_\_DwellTime.RData

**Description:** Figure 3b Source Data

**File Name:** Fig3c\_\_RunRate.RData

**Description:** Figure 3c Source Data

**File Name:** Fig3d\_\_nbackblocks.RData

**Description:** Figure 3d Source Data

**File Name:** Fig3e\_\_nBackBlockFODprime.RData

**Description:** Figure 3e Source Data

**File Name:** Fig4a-c\_\_SourceData.mat

**Description:** Figure 4a-c Source Data

**File Name:** Fig4d\_\_TPvs2backDPrime.mat

**Description:** Figure 4d Source Data

**File Name:** Fig5b\_\_ControlEnergyMagnitudeVsNulls.mat

**Description:** Figure 5b Source Data

**File Name:** Fig5c\_\_WholeBrainControl2Back.RData

**Description:** Figure 5c Source Data

**File Name:** Fig5c\_\_WholeBrainControlRest.RData

**Description:** Figure 5c Source Data

**File Name:** Fig5d\_\_VISControl2Back.RData

**Description:** Figure 5d Source Data

**File Name:** Fig5d\_\_VISControlRest.RData

**Description:** Figure 5d Source Data

**File Name:** Fig6c\_\_TransitionEnergyAge.RData

**Description:** Figure 6c Source Data

**File Name:** Fig6d\_\_RestTPAge.RData

**Description:** Figure 6d Source Data

**File Name:** Fig6e\_\_0backTPAge.RData

**Description:** Figure 6e Source Data

**File Name:** Fig6f\_\_1backTPAge.RData

**Description:** Figure 6f Source Data

**File Name:** Fig6g\_\_2backTPAge.RData

**Description:** Figure 6g Source Data

**File Name:** Fig6h\_\_nbackTPAge.RData

**Description:** Figure 6h Source Data
